# Supplementary material for: Solvatochromism in urea/water and urea-derivative/water solutions
Source: Royal Society of Chemistry journal article supplement (doi:10.1039/d0cp03816d), 2020-01-01
Supplement: d0cp03816d1.pdf [file d0cp03816d1.pdf]

Electronic Supplementary Information (ESI):

## Solvatochromism in Urea/Water and Urea-Derivative/Water Solutions

C. Civera\*(1), J. C. del Valle(2), M. A. Elorza(1), B. Elorza(1), C. Arias(1), C. Díaz-Oliva(2), J. Catalán(2)\*, F. García Blanco(1)\*

(1)Facultad de Farmacia, Departamento de Química en Ciencias Farmacéuticas, Facultad de Farmacia, Universidad Complutense de Madrid, [mccivera@ucm.es](mailto:mccivera@ucm.es), [fco@ucm.es](mailto:fco@ucm.es)

(2)Facultad de Ciencias, Departamento de Química Física Aplicada, Universidad Autónoma de Madrid, [javier.catalan@uam.es](mailto:javier.catalan@uam.es), [juan.valle@uam.es](mailto:juan.valle@uam.es)

Solvent polarizability has been obtained from the Lorentz-Lorenz equation  $f(n^2)$ , and from the refraction indexes measured herein. Catalan and Hopf (European J Org Chem. 2004 Nov;(22):4694–5702) demonstrated that there exists a linear correlation between the SP scale and the Lorentz-Lorenz equation;  $SP = -9115.7 f(n^2) + 23791$ . The SdP values were estimated from the results given by Catalán (J Phys Chem B. 2009 Apr 30;113(17), 5951–5960) from the equation which relates the SdP parameter with the  $\Delta f$  function, which depends on the Kirkwood relationship  $f(\epsilon)$  minus the  $f(n^2)$  Lorentz-Lorenz relationship ( $\Delta f = f(\epsilon) - f(n^2)$ ), that is:  $SdP = -2.549 \Delta f + 3.913 \Delta f^2 + 0.655$ . (For instance,  $f(\epsilon) = (\epsilon-1)/(\epsilon+2)$ ;  $f(n^2) = (n^2-1)/(n^2+2)$ .)

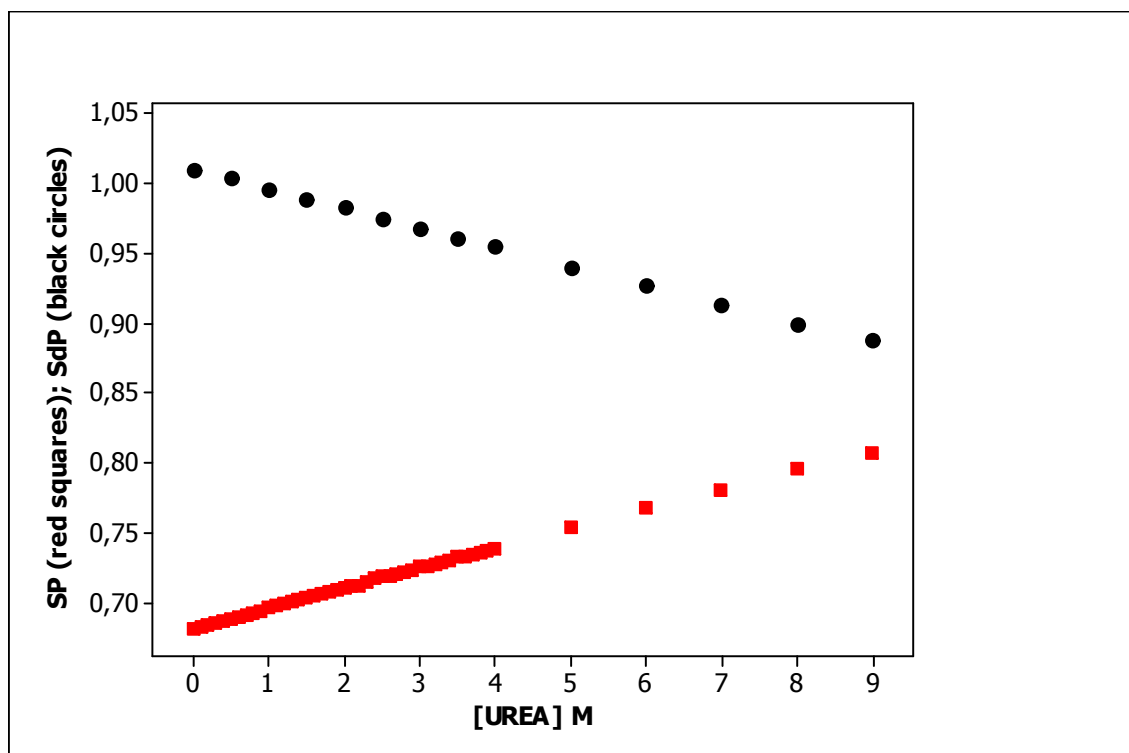

Figure 1. Relationship of the SP (red squares) and SdP (black circles) values for the Urea/Water (U/W) solutions against urea molar concentration.

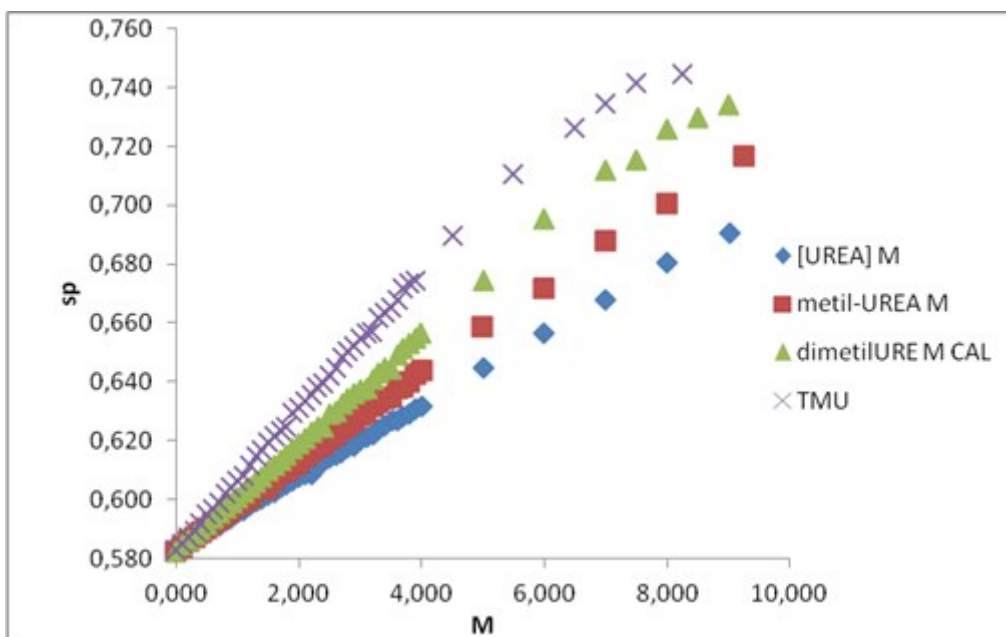

Figure 2. SP values for the solutions of Urea/Water (U/W), Methylurea/Water (MU/W), Dimethylurea/Water (DMU), and Tetramethylurea/Water (TMU/W) against molar concentration of the corresponding denaturant. All of them show quite a linear relationship up to 9 M sample concentration.

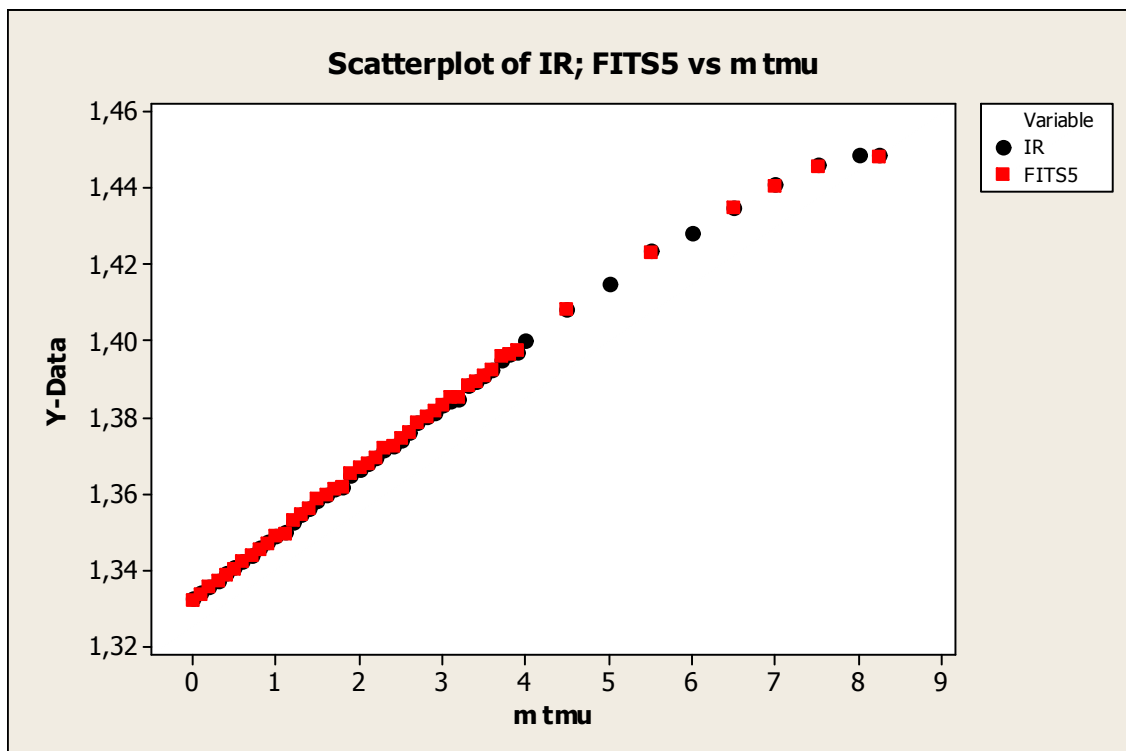

Figure 3. Refraction indexes for the molecule tetramethylurea (TMU) in water solution against TMU molar concentration up to 8 M. The fit in red is compared with the

experimental value in black. See also Table 1,  $n_{tmu} = 0.767 + 0.829 \text{ SP}$ ,  $S = 0.000393192$  and  $R^2 = 1.00$ .

Table S1. Solvatochromic parameters SA, SB and SPP for urea in water solutions.

| Molarity | Urea SA | Urea SB | Urea SPP |
|----------|---------|---------|----------|
| 0.0      | 1.062   | 0.025   | 0.9620   |
| 0.5      | 1.050   | 0.022   | 0.962    |
| 1.0      | 1.040   | 0.017   | 0.962    |
| 2.0      | 1.026   | 0.075   | 0.9620   |
| 3.0      | 1.004   | 0.078   | 0.9610   |
| 4.0      | 1.001   | 0.075   | 0.9605   |
| 5.0      | 0.985   | 0.124   | 0.9585   |
| 6.0      | 0.969   | 0.114   | 0.9570   |
| 7.0      | 0.966   | 0.132   | 0.9510   |
| 8.0      | 0.965   | 0.131   | 0.949    |

Table S2. Solvatochromic parameters SP and SdP for urea in water solutions.

| M Urea in water | SP    | SdP   |
|-----------------|-------|-------|
| 0               | 0.681 | 0.997 |
| 0.1             | 0.682 | 1.008 |
| 0.2             | 0.684 | 1.008 |
| 0.5             | 0.688 | 1.000 |
| 1.0             | 0.696 | 1.000 |
| 2.0             | 0.710 | 0.992 |
| 3.0             | 0.725 | 0.978 |
| 4.0             | 0.738 | 0.964 |
| 5.0             | 0.754 | 0.946 |
| 6.0             | 0.767 | 0.937 |
| 7.0             | 0.780 | 0.920 |
| 8.0             | 0.795 | 0.895 |
| 9.0             | 0.807 | 0.874 |

Table S3. Solvatochromic parameters SA and SB for urea and its derivatives methylurea (MU), dimethylurea (DMU) and tetramethylurea (TMU) in water solutions.

| Molarity | Urea  | Urea  | DMU   | DMU   | TMU   | TMU   | MU    | MU    |
|----------|-------|-------|-------|-------|-------|-------|-------|-------|
|          | SA    | SB    | SA    | SB    | SA    | SB    | SA    | SB    |
| 0.0      | 1.062 | 0.025 | 1.062 | 0.025 | 1.062 | 0.025 | 1.062 | 0.025 |
| 0.5      | 1.050 | 0.022 | 1.038 | 0.080 | 1.056 | 0.102 | 1.044 | 0.050 |
| 1.0      | 1.040 | 0.017 | 1.013 | 0.132 | 1.023 | 0.174 | 1.030 | 0.076 |
| 2.0      | 1.026 | 0.075 | 0.974 | 0.191 | 0.972 | 0.248 | 0.999 | 0.126 |
| 3.0      | 1.004 | 0.078 | 0.947 | 0.225 | 0.911 | 0.285 | 0.977 | 0.163 |

|     |       |       |       |       |       |       |       |       |
|-----|-------|-------|-------|-------|-------|-------|-------|-------|
| 4.0 | 1.001 | 0.075 | 0.914 | 0.253 | 0.852 | 0.323 | 0.950 | 0.184 |
| 5.0 | 0.985 | 0.124 | 0.882 | 0.278 | 0.834 | 0.339 | 0.933 | 0.204 |
| 6.0 | 0.969 | 0.114 | 0.860 | 0.298 | 0.794 | 0.350 | 0.911 | 0.215 |
| 7.0 | 0.966 | 0.132 | 0.838 | 0.310 | 0.760 | 0.370 | 0.894 | 0.228 |
| 8.0 | 0.965 | 0.131 | 0.814 | 0.327 | 0.724 | 0.406 | 0.875 | 0.243 |

Table S4. Solvatochromic parameters SP, SdP and SPP for the urea (U) derivatives methylurea (MU), dimethylurea (DMU) and tetramethylurea (TMU) in water solutions.

| M   | MU<br>SP | MU<br>SdP | MU<br>SPP | DMU<br>SP | DMU<br>SdP | DMU<br>SPP | TMU<br>SP | TMU<br>SdP | TMU<br>SPP |
|-----|----------|-----------|-----------|-----------|------------|------------|-----------|------------|------------|
| 0   | 0.681    | 0.997     | 0.962     | 0.681     | 0.997      | 0.962      | 0.681     | 0.997      | 0.962      |
| 0.5 | 0.617    | 0.996     |           | 0.614     |            |            | 0.695     | 0.977      | 0.945      |
| 1   | 0.699    | 0.999     | 0.960     | 0.724     | 0.944      | 0.957      | 0.701     | 0.958      | 0.950      |
| 2   | 0.716    | 0.969     | 0.958     | 0.742     | 0.918      | 0.956      | 0.737     | 0.869      | 0.940      |
| 3   | 0.735    | 0.938     | 0.954     | 0.758     | 0.893      | 0.957      | 0.765     | 0.801      | 0.932      |
| 4   | 0.752    | 0.914     | 0.961     | 0.776     | 0.853      | 0.958      | 0.795     | 0.73       | 0.925      |
| 5   | 0.770    | 0.879     | 0.959     | 0.791     | 0.816      | 0.959      | 0.818     | 0.673      | 0.923      |
| 6   | 0.785    | 0.860     | 0.955     | 0.809     | 0.785      | 0.960      | 0.839     | 0.617      | 0.924      |
| 7   | 0.805    | 0.819     | 0.962     | 0.825     | 0.750      | 0.961      | 0.857     | 0.573      | 0.927      |
| 8   | 0.819    | 0.800     | 0.960     | 0.837     | 0.722      | 0.961      |           |            | 0.927      |

**Absorption spectra of some of the molecular probes employed in this work.**

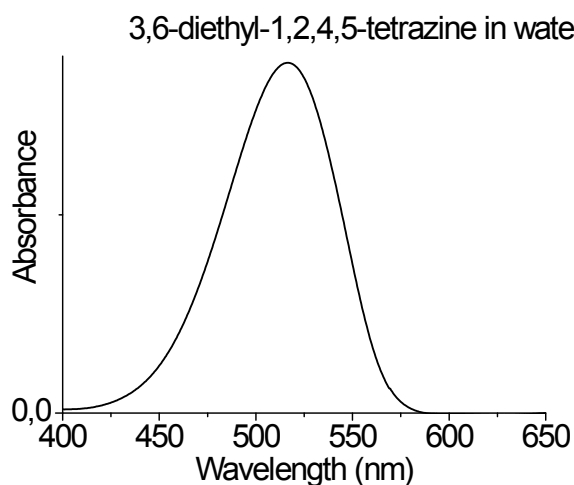

Figure 4 Absorption spectrum of 3,6-diethyl-1,2,4,5-tetrazine in water solution.

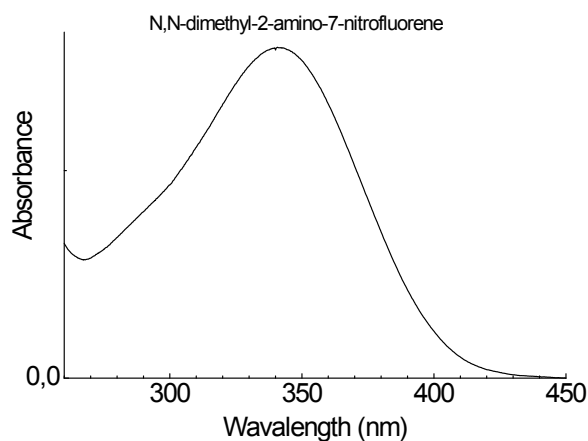

Figure 5 Absorption spectrum of N,N-dimethyl-2-amino-7-nitrofluorene in water solution.

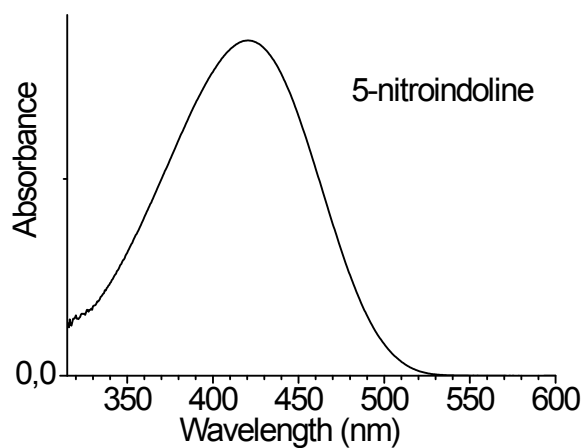

Figure 6 Absorption spectrum of the 5-nitroindoline molecule in water.

The UV-Vis absorption spectrum of the molecular probe 1-methyl-5-nitroindoline is reported in ACS Omega, 2018, 3, 18930-18934 (J. Catalán and J.C. del Valle). The UV-Vis absorption spectrum of the 3,6-diethyl-1,2,4,5-tetrazine molecule is reported in Eur. J. Org. Chem. 1999, 885-891 (J. Catalán, C. Díaz –c.f. reference 50 in the paper).
